# Supplementary material for: Serological Survey of Aujeszky’s Disease in Wild Boar from Southeastern France
Source: MDPI journal article supplement (doi:10.3390/pathogens11101107), 2022-09-27
Supplement: s1 [file s1]

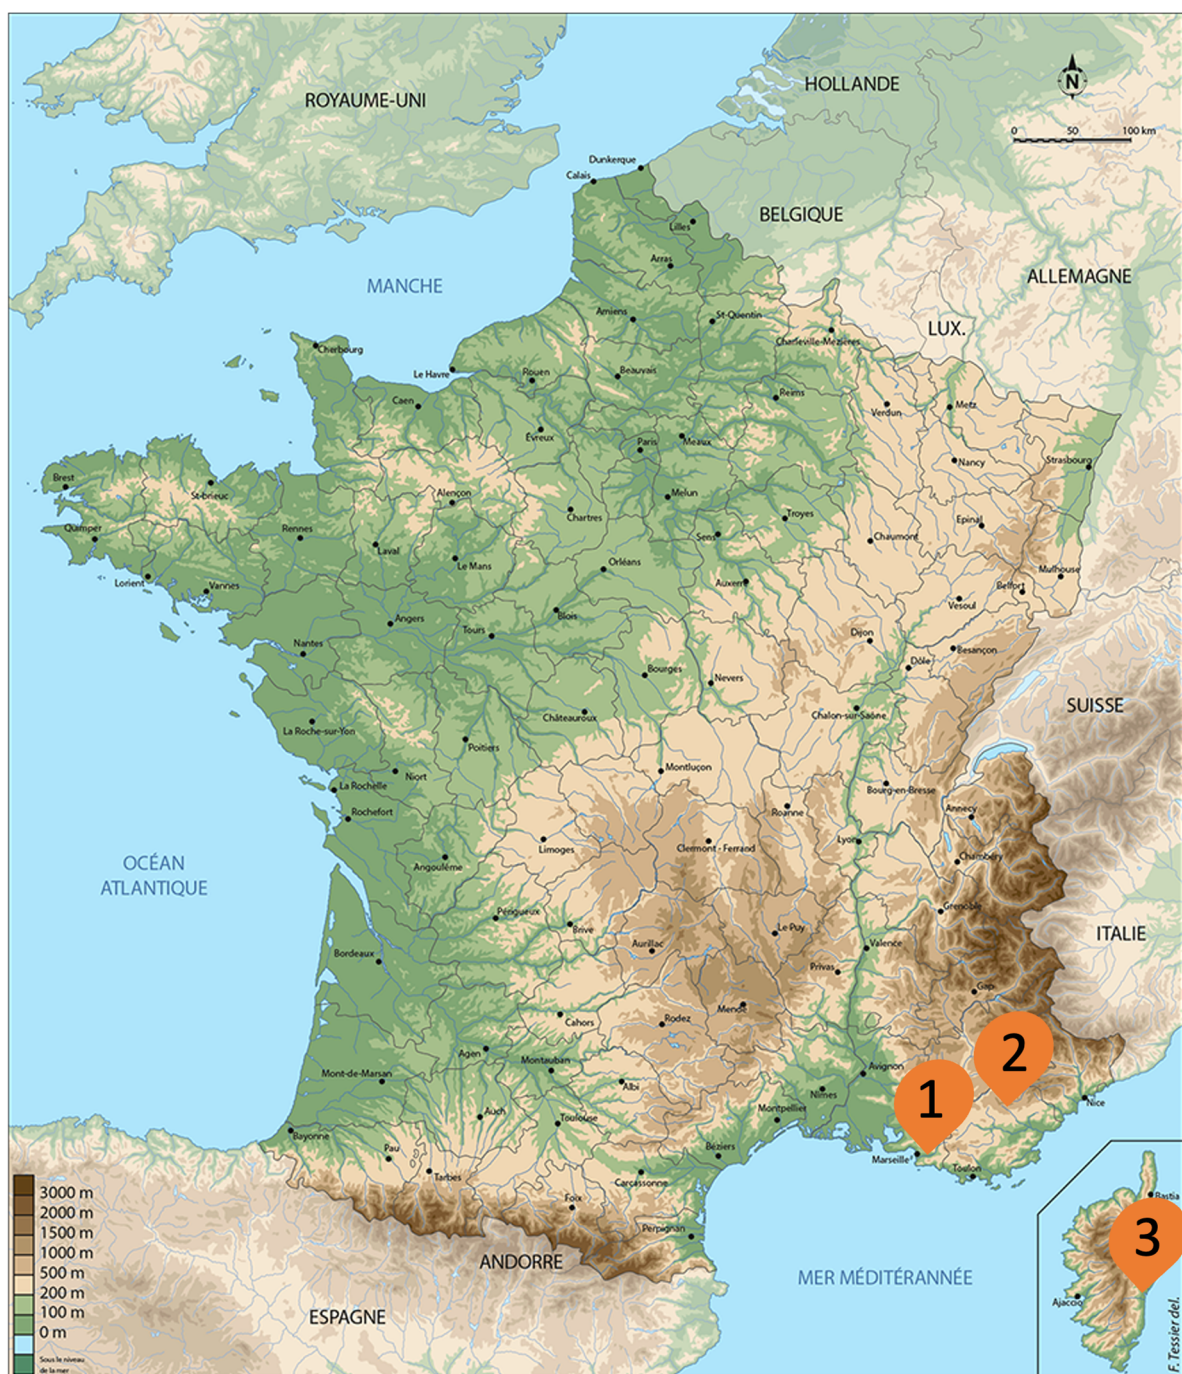

**Figure S1.** Geographical map showing the location of the investigated areas: 1. Carpiagne, 2. Canjuers and 3. Solenzara.
